## RESEARCH ARTICLE

# Metabolic engineering of *Rhodococcus ruber* Chol-4: A cell factory for testosterone production

Govinda Guevara, Yamileth Olortegui Flores, Laura Fernández de las Heras, Julián Perera, Juana María Navarro Llorens \*

Department of Biochemistry and Molecular Biology, Facultad de CC, Biológicas, C/Jose Antonio Novais, Universidad Complutense de Madrid, Madrid, Spain

\* [joana@solea.quim.ucm.es](mailto:joana@solea.quim.ucm.es)

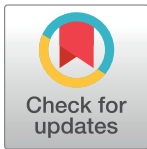

## OPEN ACCESS

**Citation:** Guevara G, Olortegui Flores Y, Fernández de las Heras L, Perera J, Navarro Llorens JM (2019) Metabolic engineering of *Rhodococcus ruber* Chol-4: A cell factory for testosterone production. PLoS ONE 14(7): e0220492. <https://doi.org/10.1371/journal.pone.0220492>

**Editor:** Andrei Chernov, University of California San Diego, UNITED STATES

**Received:** May 13, 2019

**Accepted:** July 17, 2019

**Published:** July 26, 2019

**Copyright:** © 2019 Guevara et al. This is an open access article distributed under the terms of the [Creative Commons Attribution License](https://creativecommons.org/licenses/by/4.0/), which permits unrestricted use, distribution, and reproduction in any medium, provided the original author and source are credited.

**Data Availability Statement:** All relevant data are within the paper and its Supporting Information files.

**Funding:** This work was supported by project RTC-2014-2249-1 from MINECO, Spain, to GG. The funders had no role in study design, data collection and analysis, decision to publish, or preparation of the manuscript.

**Competing interests:** The authors have declared that no competing interests exist.

## Abstract

*Rhodococcus ruber* Chol-4 is a potent steroid degrader that has a great potential as a biotechnological tool. As proof of concept, this work presents testosterone production from 4-androstene-3,17-dione by tailoring innate catabolic enzymes of the steroid catabolism inside the strain. A *R. ruber* quadruple mutant was constructed in order to avoid the breakage of the steroid nucleus. At the same time, an inducible expression vector for this strain was developed. The 17-ketoreductase gene from the fungus *Cochliobolus lunatus* was cloned and overexpressed in this vector. The engineered strain was able to produce testosterone from 4-androstene-3,17-dione using glucose for cofactor regeneration with a molar conversion of 61%. It is important to note that 91% of the testosterone was secreted outside the cell after 3 days of cell biotransformation. The results support the idea that *Rhodococcus ruber* Chol-4 can be metabolically engineered and can be used for the production of steroid intermediates.

## Introduction

Steroids are a family of terpenoid lipids widely distributed in nature that present a common structure formed by four fused alicyclic rings called gonane ([S1 Fig](#)). They play important biological roles in eukaryotic cell membrane stabilization (e.g. structural steroids such as cholesterol) and the regulation of cellular processes such as proliferation and differentiation (e.g. steroid hormones such as progesterone or testosterone, TS).

Steroid-based drugs are widely used as anti-inflammatory, diuretic, anabolic, contraceptive, anti-androgenic, progestational and anticancer agents and they are therefore a highly valuable resource for the pharmaceutical industry with an annual global market of over \$10 billion [1]. Steroids can be chemically produced in a variety of ways, but the most common initial substrates for their production are cost-effective phytosterols, derived from plants [2]. However, in the recent years, there has been an increasing effort to move from the multistep chemical process to a single step microbial bioconversion process that could reduce costs and production yield losses, and would also be more eco-friendly [1]. All this led to an increasing interest

**Abbreviations:** AD, 4-androstene-3,17-dione; 17 $\beta$ -HSD, 17 $\beta$ -hydroxysteroid oxidoreductase; TS, testosterone; KstD, Ksh3-ketosteroid- $\Delta^1$ -dehydrogenases; Ksh, 3-ketosteroid-9 $\alpha$ -hydroxylase; AD, 4-androstene-3,17-dione; ADD, 1,4-androstadiene-3,17-dione; 9OH-AD, 9 $\alpha$ -hydroxy-4-androstene-3,17-dione; 9OH-ADD, 9 $\alpha$ -hydroxy-1,4-androstadiene-3,17-dione; HAS, 3-hydroxy-9,10-secoandrost-1,3,5(10)-triene-9,17-dione; TLC, Thin-layer chromatography.

in the use of recombinant bacteria as cell biofactories. These compounds are synthesized and found predominantly in eukaryotic cells while some bacteria, that rarely generate them, are able to use these compounds as growth substrates [3].

Currently, this objective is much more achievable thanks to recent advances in our understanding of steroid bacterial catabolism, which led to the development of bacterial strains that can convert precursors (e.g. phytosterols from cheap agricultural plant waste) into high-value steroids [4, 5]. Therefore, in this work, we present *Rhodococcus* as a promising candidate for steroid production.

The cholesterol-degrading *R. ruber* strain Chol-4, isolated from a sewage sludge sample, was chosen [6] as a model organism in this work for the following reasons: i) *R. ruber* strain Chol-4 is able to catabolize steroids; ii) many of its enzymes involved in the steroid catabolism have been characterized in the past years and iii) an important mutant strain collection listed in S1 Table is now available [7–10]. However, so far, there are only a few studies on the use of engineered *Rhodococcus* as a cell system for pharmaceutical steroid production [11–13].

The proposed catabolic oxidative pathway of cholesterol and phytosterols in many actinobacteria is formed by a complex set of enzymatic reactions that includes an upper pathway (the oxidation to 4-cholesten-3-one and the carbon side chain cleavage at C17, similar to the  $\beta$ -oxidation of fatty acids) while attempting polycyclic ring opening [14–18]. Two key enzymes initiate the opening of the steroid ring: the 3-ketosteroid- $\Delta^1$ -dehydrogenase [4-ene-3-oxosteroid: (acceptor)-1-ene-oxoreductase; EC 1.3.99.4], also known as KstD and the 3-ketosteroid 9 $\alpha$ -hydroxylase [Androsta-1,4-diene-3,17-dione; EC 1.14.13.142], known as Ksh [19]. KstD is a flavoenzyme involved in the  $\Delta^1$ -dehydrogenation of the steroid molecule leading to the initiation of the breakdown of the steroid nucleus by introducing a double bond into the A-ring (see S1 Fig) of 3-ketosteroids [20, 21]. This flavoprotein converts 4-ene-3-oxosteroids (e.g. 4-androstene-3,17-dione or AD) to 1,4-diene-3-oxosteroids (e.g. 1,4-androstadiene-3,17-dione or ADD) by trans-axial elimination of the C-1( $\alpha$ ) and C-2( $\beta$ ) hydrogen atoms [22]. KshAB is an enzymatic complex responsible for C9 $\alpha$ -hydroxylation; it consists of a terminal oxygenase (KshA subunit) which performs substrate hydroxylation and a ferredoxin reductase (KshB subunit) which mediates the electron transfer [23].

AD is a substrate for both KstD and KshAB enzymes that yield ADD and 9 $\alpha$ -hydroxy-4-androstene-3,17-dione (9OH-AD), respectively. These products are further transformed with the same combination of enzymes to finally yield the unstable compound 9 $\alpha$ -hydroxy-1,4-androstadiene-3,17-dione (9OH-ADD) that spontaneously breaks the B ring to generate 3-hydroxy-9,10-secoandrost-1,3,5(10)-triene-9,17-dione (3-HSA). Finally, the lower catabolic pathway leads to formation of primary metabolites (Fig 1) [15]. When Ksh activity is inactivated, ADD is accumulated as the result of KstD activity on the intermediates generated from side chain degradation. Similarly, 9OH-AD is accumulated after inactivating the KstD activity [15, 24].

A mutant with impaired Ksh and KstD activities is not able to degrade AD, favoring its modification into any molecule of interest with the appropriate enzymatic activity. *Rhodococcus*, just like other actinobacteria, has many isoforms of these enzymes. Fortunately, all *R. ruber* KshA isoforms (KshA1, KshA2, KshA3) combine with only one KshB, therefore Ksh activity is absent by knocking down the *kshB* gene [9]. *R. ruber* displays three KstD isoforms (KstD1,2,3) and therefore it is necessary to knock down all of them to impair KstD activity [8, 10].

To study the biotechnological capabilities of a *R. ruber* system, a biotransformation of AD to testosterone, a natural steroid hormone from the androgen group, was conducted using the fungal enzyme 17-ketosteroid reductase. As the degradation pathway of AD is well

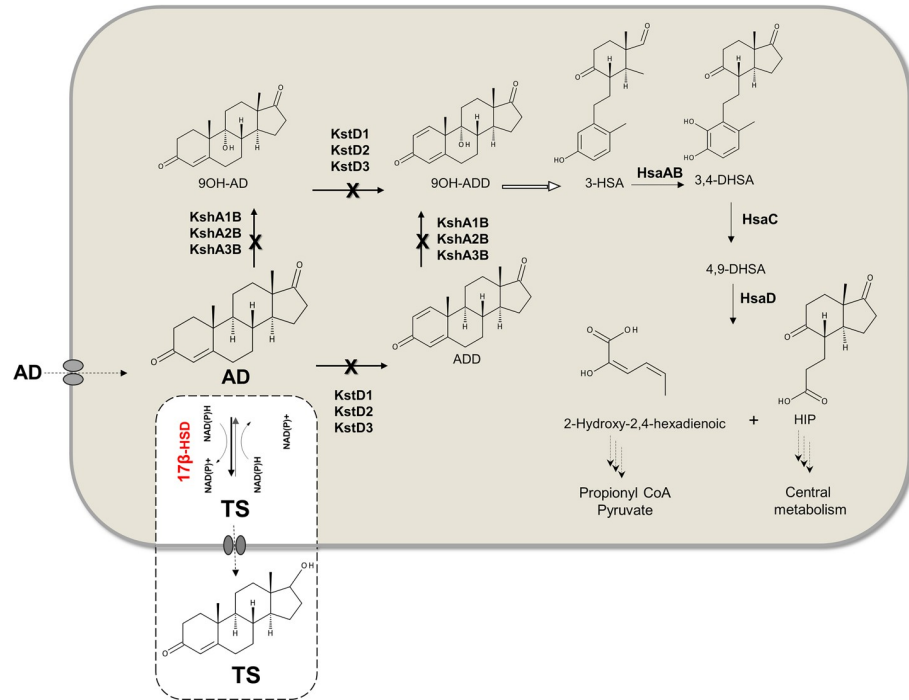

**Fig 1. Metabolic network for the production of TS from AD.** *Rhodococcus ruber* catabolizes the AD through different steps. The  $\Delta kshB$ - $kstD1,2,3$  quadruple mutant strain (cross marks point out the mutations done) has the AD catabolic enzymes blocked and therefore it could be used as chassis for the production of AD-derivatives. As a proof of concept, the recombinant strain harboring the 17 $\beta$ -HSD fungal enzyme yielded testosterone from AD. Abbreviations: AD: 4-androstene-3,17-dione; ADD: 1,4-androstadiene-3,17-dione TS: testosterone; 9OH-AD: 9 alpha-hydroxyandrost-1,4-ene-3,17-dione; 9OH-ADD: 9 alpha-hydroxyandrost-1,4-diene-3,17-dione; 3-HSA: 3-hydroxy-9,10-secoandrost-1,3,5(10)-triene-9,17-dione; 3,4-DHSA: 3,4-dihydroxy-9,10-secoandrost-1,3,5(10)-triene-9,17-dione; 4,9-DHSA: 3-hydroxy-5,9,17-trioxo-4,5,9,10-disecoandrost-1(10),2-dien-4-oate; HIP: 9,17-dioxo-1,2,3,4,10,19-hexanorandrost-5-oic acid. KstD: 3-ketosteroid  $\Delta 1$ -dehydrogenase; KshAB: 3-cetosteroid-9 $\alpha$ -hidroxilasa; HsaAB: 3-hydroxy-9,10-secoandrost-1,3,5(10)-triene-9,17-dione monooxygenase; HsaC: extradiol dioxygenase; HsaD: 9,10-diseco-3-hydroxy-5,9,17-trioxoandrost-1(10),2-diene-4-oate hydrolase.

<https://doi.org/10.1371/journal.pone.0220492.g001>

characterized in *Rhodococcus ruber*, this substrate was chosen for the study. Assays were not considered on other steroids such as cholesterol or phytosterols as initial substrates because *R. ruber* displays more than one steroid pathway, whose major steps remain unknown and do not consequently yield AD as intermediate in this strain [8, 9].

The enzyme 17-ketosteroid reductase (17 $\beta$ -HSD; 17 $\beta$ -hydroxysteroid:NADP 17-oxidoreductase, EC 1.1.1.64) chosen for this work was obtained from the filamentous fungus *Cochliobolus lunatus* (17 $\beta$ -HSDcl) and its DNA sequence was previously codon optimized for the actinobacteria *Mycobacterium* [5]. This enzyme has been subjected to extensive biochemical, kinetic and quantitative structure-activity relationship studies [25–32]. It catalyzes a reversible NAD(P)H/NAD(P)<sup>+</sup>-dependent reduction/oxidation reaction in the hydroxyl/keto groups at the C-17 position of different steroids [33–35], although it is more active in reduction [27, 29–31]. Therefore, 17 $\beta$ -HSDcl was a strong candidate to be used in bacteria to obtain testosterone from AD. Recently, a biological model system for industrial production of testosterone using the enzyme 17 $\beta$ -HSDcl in an engineered *Mycobacterium smegmatis* has been described [5]. A scheme of the transformation process by this enzyme using the *R. ruber* mutant is shown in Fig 1. It is important to note that the blocking of Ksh or KstD activities in this strain also yielded a lack of growth on testosterone [9, 10].

To sum up, this work presents *R. ruber* as a candidate for steroid biotransformation and, to test the system, testosterone was produced. To achieve this aim, several steps were taken: first, a Chol-4 quadruple mutant  $\Delta kshB-kstD1,2,3$  strain had to be generated to have a convenient enzymatic cellular background to completely block the AD catabolism (Fig 1); secondly, as no available plasmid was functional on the *R. ruber* strain Chol-4, a specific expression vector had to be built for this strain. Finally, it was necessary to obtain a recombinant strain overexpressing the *17 $\beta$ -hsd* gene.

## Results and discussion

### Construction of $\Delta kshB-kstD1,2,3$ *R. ruber* strain Chol-4 mutant

AD is a substrate of both KstD and KshAB activities in *R. ruber*. The KstD1,2,3 *R. ruber* mutant accumulates 9OH-ADD from AD while the KshB *R. ruber* mutant accumulates ADD [8, 9]. Therefore, the first step to obtain steroid derivatives from AD in *R. ruber*, is to block its AD catabolic pathway by building a mutant strain in which the activity of these enzymes is impaired (Fig 1). Besides avoiding the AD consumption, the quadruple mutant  $\Delta kshB-kstD1,2,3$  has also blocked the testosterone catabolism.

In order to get the quadruple mutant, the  $\Delta kstD1,2,3$  strain [8] (S1 Table) was used for *kshB* gene deletion, according to Material and methods section. The  $\Delta kshB-kstD1,2,3$  quadruple mutant was checked by PCR. The growth experiments proved that it was not able to grow on 2 mM AD, ADD or testosterone while it kept growing on 24 mM sodium acetate (S2 Fig). The slight growth seen on cholesterol is due to the consumption of the side chain of this substrate [9]. Therefore, the quadruple mutant was suitable to be used as a host for the *17 $\beta$ -hsd* overexpression for AD biotransformation.

### Construction of an expression vector for *R. ruber* Chol-4 and *17 $\beta$ -hsd* gene cloning

Attempts to transform *R. ruber* Chol-4 with expression vectors (pTIP-QC1, pNIT-QC1, pTNR-KA, pTNR-TA, etc.) were unsuccessful. The biotechnological potential use of *R. ruber* was restricted by the need for an appropriate expression vector.

To create an inducible expression vector for *R. ruber*, we combined the pNV119 vector, which was able to replicate in this strain, and an artificial regulon (GenBank: FjI73069) [36] that contains a gene encoding a regulatory protein (NitR) under the control of the inducible promoter *PnitA* and a separate cistron with a second *PnitA* promoter followed by a multiple cloning site (MCS). The native ribosome binding site of the *nitR* gene was preserved in the MCS. This arrangement of regulatory elements creates a positive-feedback loop in which the expression of both the regulatory protein and the target gene are simultaneously induced (Fig 2A). The inducer is the nitrile derivative  $\epsilon$ -caprolactam [36]. This cassette, called NIT-1, was synthesized for this work by Invitrogen. The pNV119 derived vector containing this cassette was called pNVNIT (Fig 2A). *R. ruber* was successfully transformed with this vector, providing a way to check its potential as a functional expression vector for this strain.

Similarly to *M. smegmatis* mc2155 [5], we were not able to identify any 17 $\beta$ -HSD homologous enzyme in *R. ruber* Chol-4 by blasting the protein sequence against its genome (GenBank::NZ\_ANGC00000000.2). Therefore, a synthetic variant of the fungal enzyme 17 $\beta$ -HSD codon-optimized for actinobacteria and efficient in the actinobacteria *Mycobacterium* [5] was chosen to be cloned and overexpressed in *R. ruber*.

Finally, the synthetic *C. lunatus* *17 $\beta$ -hsd* gene was obtained from the pUC57-17HSD plasmid [5] and cloned into the pNVNIT vector (Fig 2B and 2C), giving rise to the pNVNIT-17 $\beta$ HSD plasmid.

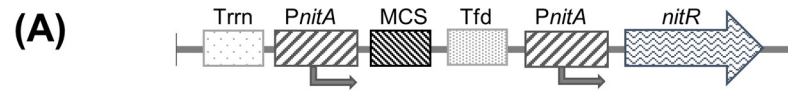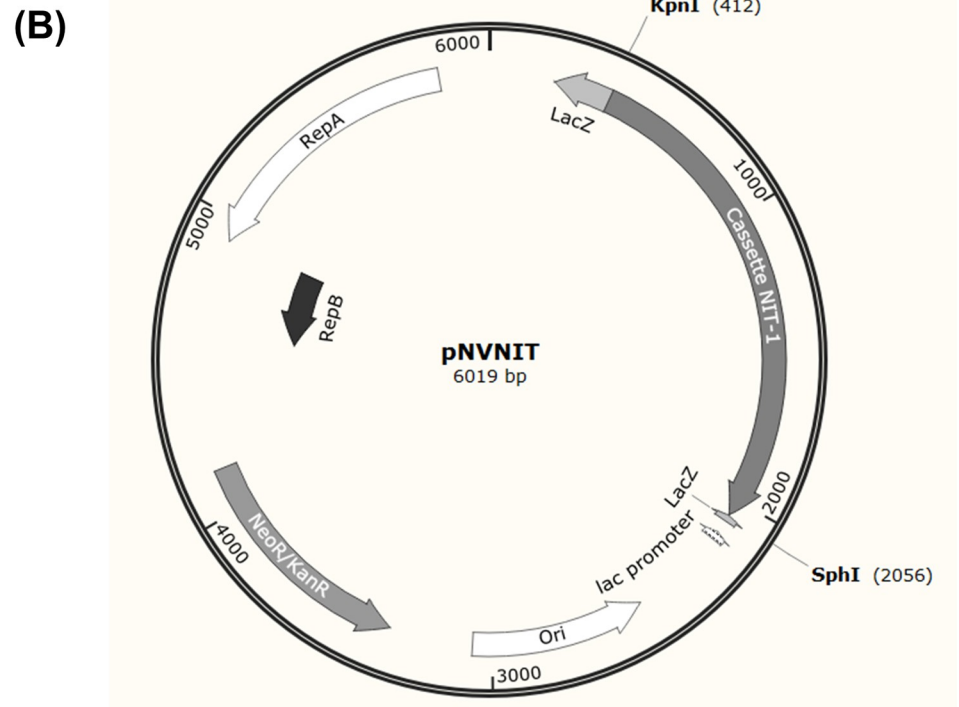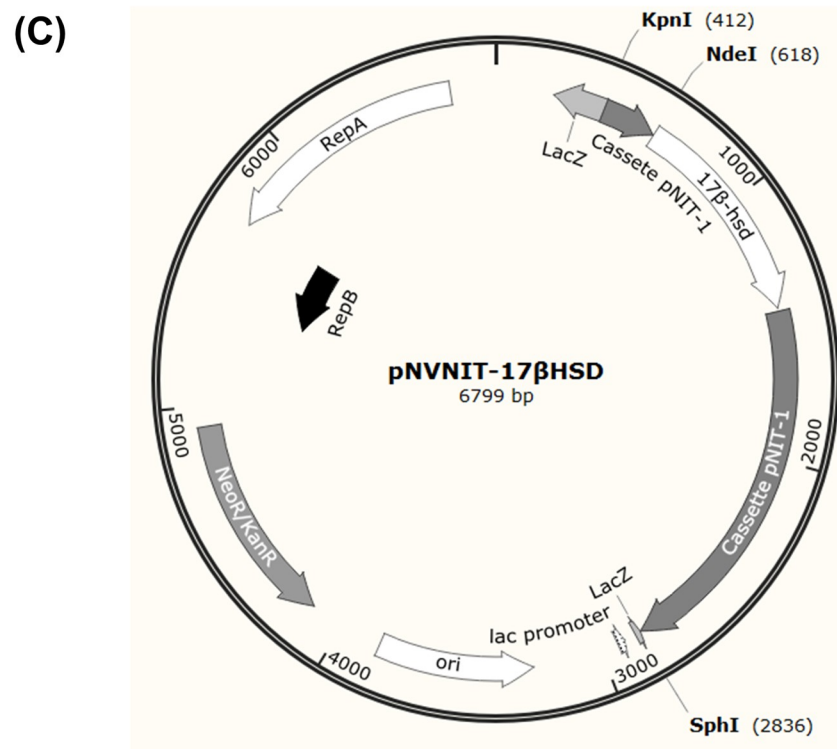

**Fig 2. Construction of pNVNIT-17 $\beta$ HSD vector.** (A) Scheme of the NIT-1 cassette adapted from Pandey *et al.* 2009 [37]. *PnitA*: promoter of the *nitR* gene; NitR: regulatory protein; MCS: multiple cloning site. Trn and Tfd stand for two strong terminator sequences, one derived from the *E. coli rrnAB* operon and the other one from the bacteriophage fd respectively. The NIT-1 cassette was cloned in the *KpnI-SphI* sites of the pNV119 vector to generate the pNVNIT vector. (B) Scheme of the pNVNIT vector. (C) The *C. lunatus* 17 $\beta$ -*hsd* gen was cloned in the *NdeI-DraI* sites of the pNVNIT vector yielding to pNVNIT-17 $\beta$ HSD.

<https://doi.org/10.1371/journal.pone.0220492.g002>

## Expression of 17 $\beta$ -HSD recombinant protein and AD biotransformation

The wild-type (WT) and the knockout mutant strain ( $\Delta kshB-kstD1,2,3$ ) were transformed with two plasmids: pNVNIT (as control, Fig 2B) and pNVNIT-17 $\beta$ HSD expression vector (Fig 2C). Recombinants harboring the plasmids were used for a growing-cell biotransformation study. As a first approach to detect testosterone, a culture of each strain (wild-type and mutant strain transformed with both plasmids) were grown on LB. After 16–24 hours (0.8–1.0 DO<sub>600nm</sub>), the  $\epsilon$ -caprolactam inductor was added and 24 hours later, 1 mg/mL of AD was added in powder form. Samples were taken at different times for analysis by Thin-layer chromatography (TLC). As it is shown in Fig 3A, line 1, the wild-type strain, harboring the pNVNIT plasmid, progressively converted the AD into ADD, as its metabolic machinery is kept intact. The quadruple *R. ruber* mutant, also containing the pNVNIT plasmid, but with the steroid catabolic pathway impaired, was unable to metabolize AD (Fig 3B, line 1).

In the case of the quadruple mutant harboring the pNVNIT-17 $\beta$ HSD vector, the biotransformation of AD to TS can only be seen 6 hours after the addition of AD.

The wild-type strain expressing 17 $\beta$ HSD does not produce any TS detectable by TLC (Fig 3). The WT strain can deploy its complete catabolic system to consume the AD entering into the cell. Therefore, it could be expected that the metabolic flow goes toward AD degradation rather than testosterone production. Moreover, if testosterone was produced, it could soon be degraded by the intact cell machinery and by no means detected by TLC or HPLC.

The TLC analysis of the quadruple mutant also showed two spots: one with the same RF than the ADD standard and another an unknown product. The presence of the last one in the TLC might be a LB medium metabolite since the spot disappears when the biotransformation takes place in minimal media. The product that was expected to be ADD by TLC (Fig 3B) was not found by HPLC, and therefore it is not ADD. The presence of this product could be explained due to the action of other enzymes different to KstD1,2,3 that might function as a ketosteroid dehydrogenase in *R. ruber* and that could alternatively yield an additional product. Minimum medium instead of LB medium was used for the rest of the experiments in order to avoid contamination with undesired metabolites.

These results suggest that the pNVNIT can be an excellent expression vector for *R. ruber*, a vector that can broaden the use of this bacteria for biotransformation processes.

The ability to produce TS from AD was verified by HPLC in the recombinant *R. ruber* cells supplemented with 1 mM AD (Fig 4). TS production observed was 410  $\mu$ M 24 hours after the  $\epsilon$ -caprolactam induction of the culture with a molar conversion rate of AD to TS of  $48.2 \pm 3.9\%$ .

On the other hand, the activity of the enzyme 17 $\beta$ -HSD involves a nicotinamide cofactor [26, 37, 38]. The ratio between the oxidized and the reduced form of this type of cofactors plays a crucial role in microbial redox reactions and energy metabolism. The regeneration of this ratio is an important step to be taken into account in biocatalysis [39]. Moreover, *in vivo*, this kind of enzymes displayed a directional preference that depends on the relative affinity for nicotinamide cofactors [NAD(P)(H)] and existing cofactor gradients. For instance, ketosteroid reduction could be favored by keeping the NADPH/NADP<sup>+</sup> ratio high [37, 38]. Therefore, the

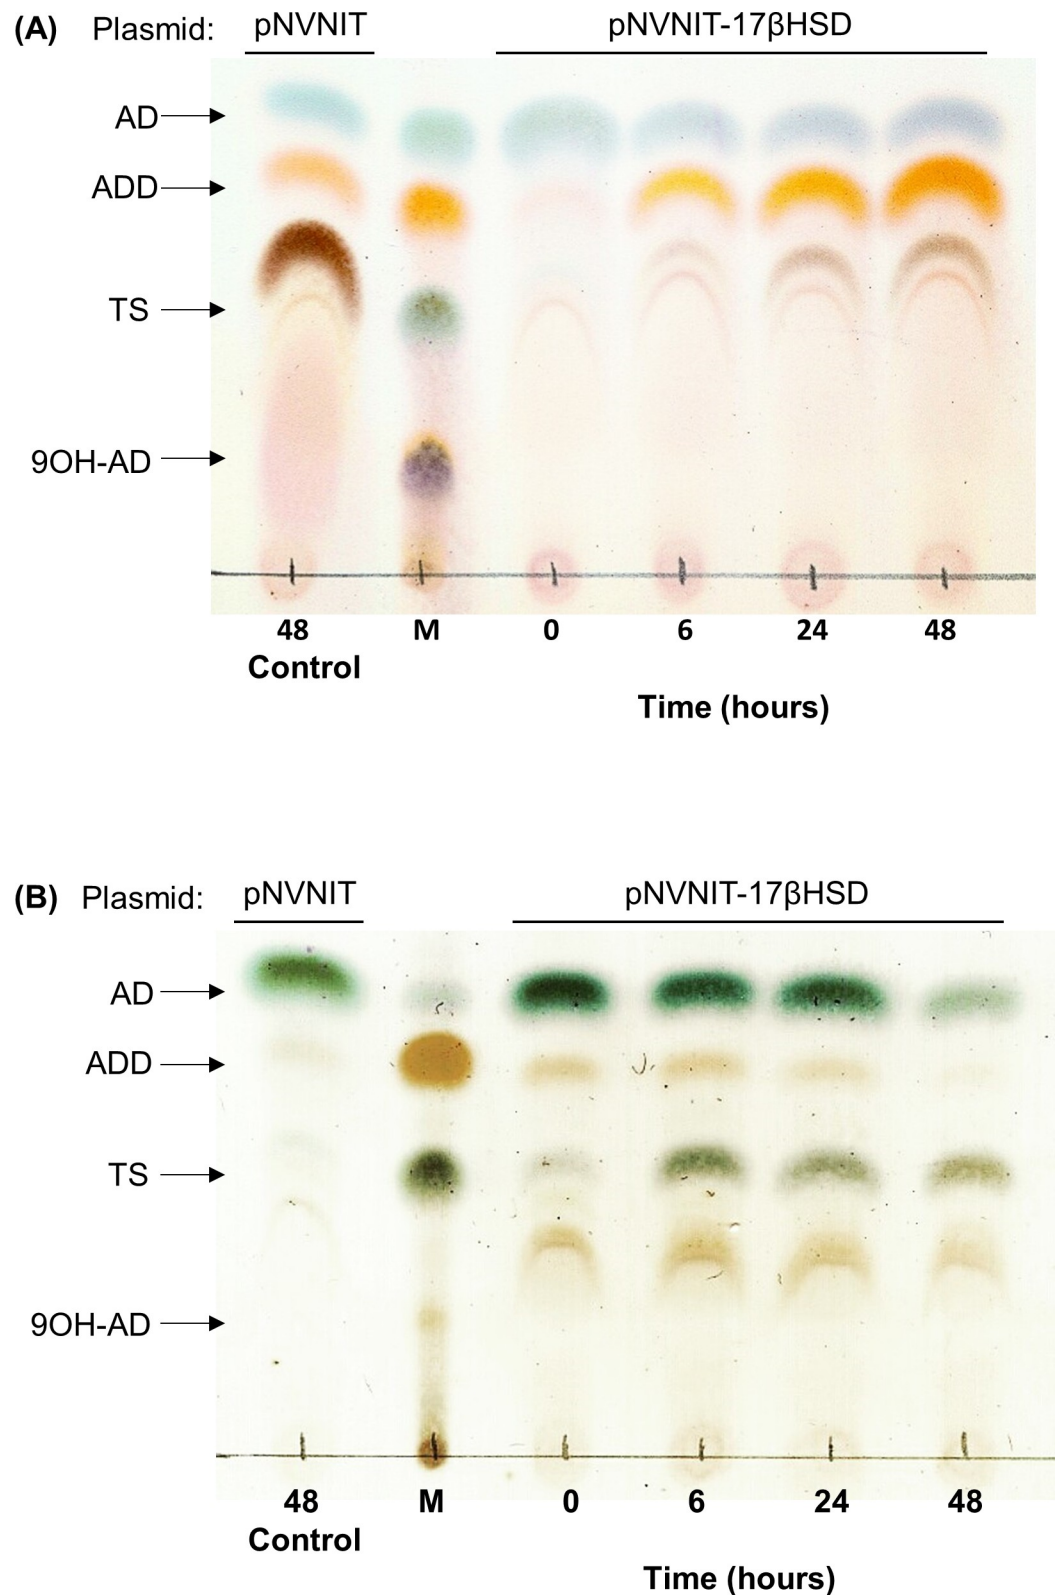

**Fig 3. Analysis of Testosterone production from AD by TLC.** The strains were grown in LB at 30°C and 250 rpm until a 0.8 OD<sub>600nm</sub> was reached and induced with 28 mM ε-caprolactam for 24 hours. The biotransformation assay started by adding 1 mg/mL of AD and samples were taken at different times. (A) TLC of wild-type (WT) strain harboring the

pNVNIT-17 $\beta$ HSD (line 3 to 6). (B) TLC of the  $\Delta kshB$ - $kstD1,2,3$  mutant harboring the pNVNIT-17 $\beta$ HSD plasmid (line 3 to 6). The control (line 1) in Figs A) and B) belongs to the strains WT or  $\Delta kshB$ - $kstD1,2,3$  harboring the empty plasmid pNVNIT at 48 hours after the AD addition. M (line 2): markers AD, ADD, TS (testosterone) and 9OH-AD (1  $\mu$ g/ $\mu$ L).

<https://doi.org/10.1371/journal.pone.0220492.g003>

cellular ratios of NAD<sup>+</sup>:NADH or NADP<sup>+</sup>:NADPH would encourage the production of TS from steroids rather than the steroid concentration itself [37].

To restore the metabolic cofactor ratio, a supplemental carbon source must be added during the biotransformation studies [38]. Usually, cofactor regeneration is performed using glucose as a co-substrate because of its easy availability and low cost [40] and therefore, the effect of glucose was tested in the recombinant strain of this study.

The time course of TS production from AD was analyzed with and without glucose in the medium (Fig 5). By adding glucose 48h after the inoculation, cell density increased from  $2.5 \pm 0.3$  to  $8.6 \pm 0.5$ . This fact raises the molar conversion rate of AD to TS after 24 hours of bioconversion from  $48.2 \pm 3.9\%$  to  $61.5 \pm 3.0\%$ . The cell culture grown with glucose in the medium, kept AD conversion constant over time in comparison with the culture grown without glucose (Fig 5).

This result is consistent with the effects of the supplemented carbon source detected in TS production in other strains [41–43]. However, the increase in the molar conversion rate at 24 hours was not as high as the one reported in *Mycobacterium* resting-cells (from around 35% in the absence of glucose to 90% molar conversion rate in a medium supplemented with glucose) [5] reinforcing the idea that this reaction could depend on the specific metabolic context of the cell.

The maximum conversion rate of 61% obtained for the recombinant *R. ruber* is consistent with the conversion range from AD to TS described in growing cells which vary from 27% (*Saccharomyces cerevisiae* [44]) to 93% (*Zygowilliopsis* sp. WY7905 [43]). TS productivities in other bacterial cell-factories are shown on S2 Table. Optimization of this process in the recombinant *R. ruber* to obtain a better yield will need a more detailed study.

Lastly, we looked where the testosterone produced by this biotransformation process remained in the cell. After the biotransformation experiment, recombinant *R. ruber* cells were centrifuged and pellet and supernatant were separately prepared and analyzed by TLC and HPLC (Fig 6). After 3 days of biotransformation, 91% of the testosterone appeared outside the cell, indicating that the recombinant strain whose testosterone catabolic pathway is blocked due to the lack of KstD and Ksh activities, could get rid of the compound to avoid its intracellular accumulation. After 5 days of biotransformation, this percentage decreases to 75%. The reduction of the testosterone found extracellularly from 91% to 75% is not easy to explain and requires further studies. It could be possible that providing enough time, a putative induction of testosterone-transporter gene expression and an increased re-uptake of testosterone could occur in the cell and in this way favor the entry of TS from the extracellular medium.

The fact that most of the product stayed in the supernatant within the first three days of the assay shows that there is an easy way to recover the TS after a biotransformation process. Some further improvements that need to be optimized may include the rational design of the enzyme itself to obtain a better testosterone yield. Some attempts to modify the fungal enzyme have been made [25] but they have not been tested so far in a biofactory system. Further enzymatic engineering of this activity together with an in-depth study via system biology to optimize the metabolic state of the cell would help to improve the whole production process.

## Conclusions

There is a great interest in the reduction of 17-oxosteroids to 17 $\beta$ -hydroxysteroids as an important way of preparing many steroidal drugs and valuable intermediates. In this study, *R. ruber* has been metabolically engineered to effectively convert AD to testosterone as proof of



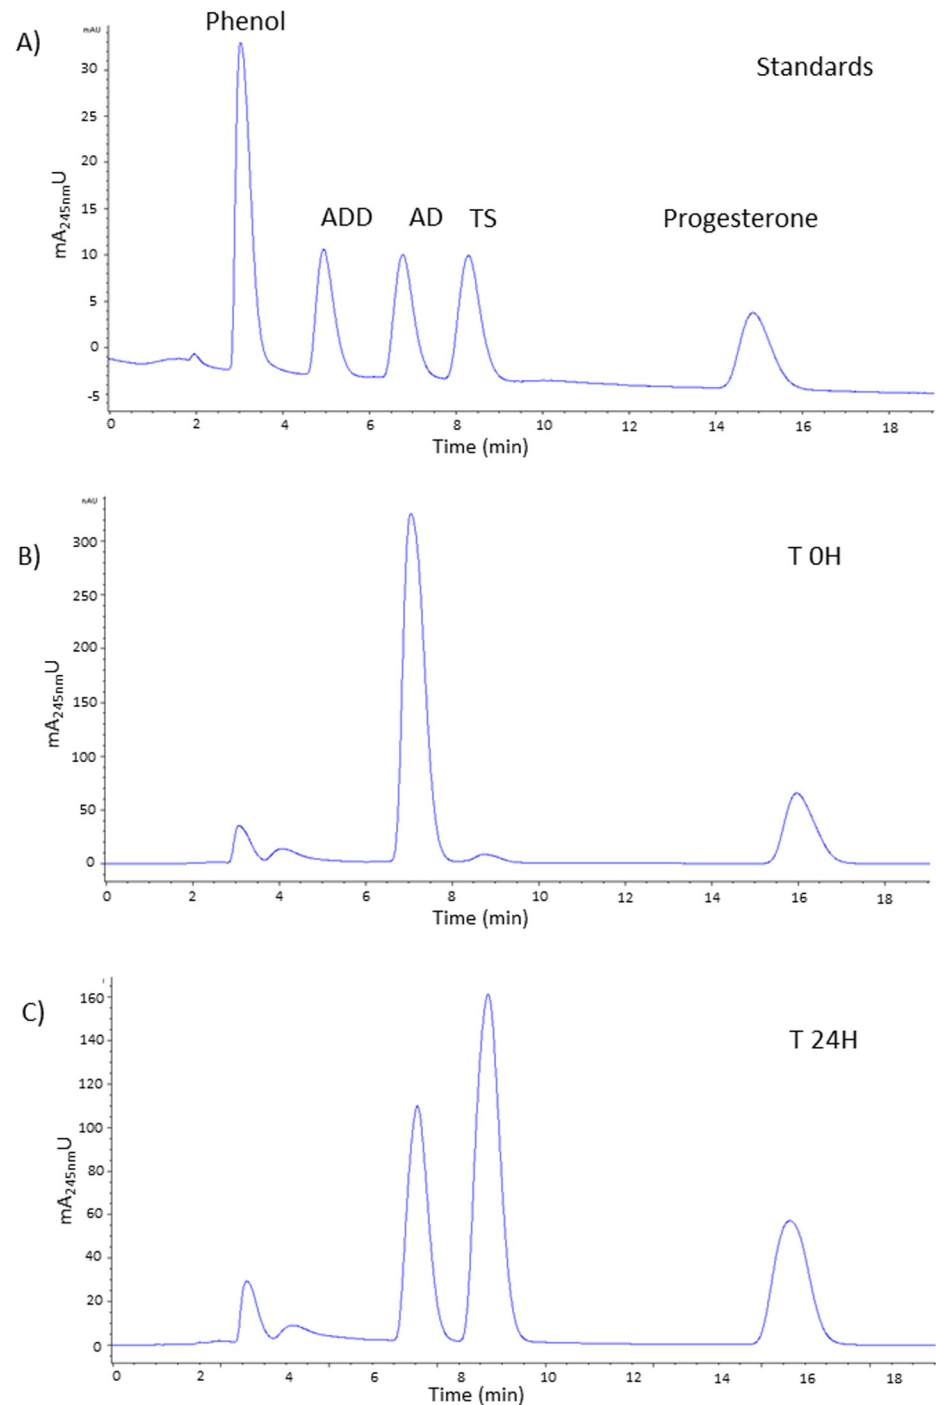

**Fig 4. HPLC chromatograms of Testosterone production using culture cells of *R. ruber* mutant strain  $\Delta kshB-kstD1,2,3$ .** Cultures harboring the pNVNIT-17 $\beta$ HSD plasmid were incubated at 30°C and 250 rpm in MM until they reached 0.8 OD<sub>600nm</sub>. Heterologous protein expression was induced with  $\epsilon$ -caprolactam (28 mM) for 24 h and then AD (1 mM) was added in a Tyloxapol solution (10% v/v). Samples were taken at different times. (A) Standards chromatogram of Phenol (2 mM), ADD, AD, TS and Progesterone (all at 25  $\mu$ M). (B) Sample took at 0 hours after adding AD and (C) Testosterone production after 24 hours of AD biotransformation. Progesterone was used as an extraction control and phenol as an HPLC internal standard.

<https://doi.org/10.1371/journal.pone.0220492.g004>

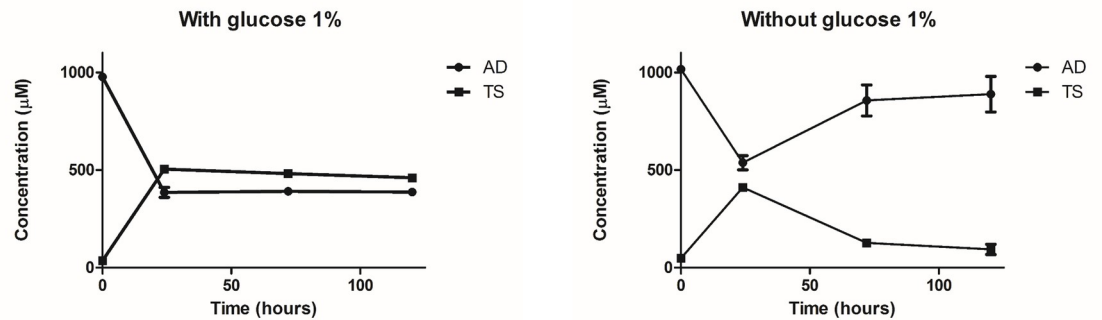

**Fig 5. Time course of TS production from AD in the recombinant *R. ruber* cells.**  $\Delta kshB-kstD1,2,3$  *R. ruber* harboring the pNVNIT-17 $\beta$ HSD construction was grown in minimal medium with sodium acetate as carbon source, at 30°C and 250 rpm until 0.8 OD<sub>600nm</sub> was reached. After 24 hours of the NIT-1 regulon induction ( $\epsilon$ -caprolactam at 28 mM) the biotransformation started by adding AD at 1 mM with or without 1% w/v glucose. Samples were taken at different times, extracted by chloroform and analyzed by HPLC.  $\Delta kshB-kstD1,2,3$  *R. ruber* harboring the pNVNIT vector as control were also tested and no testosterone was detected (not shown). Testosterone and AD concentration were determined as indicated in Material and methods. Average and standard deviation of three biological replicates are shown.

<https://doi.org/10.1371/journal.pone.0220492.g005>

its potential as a cellular factory. Genes involved in steroid ring breakage were knocked out to prevent AD and testosterone catabolism and the 17 $\beta$ -HSD enzyme from *Cochliobolus lunatus* was overexpressed using an expression vector specifically designed for *R. ruber*. The recombinant strain produces a yield of 61% testosterone from AD after the biotransformation studies. 91% of the testosterone was recovered extracellularly, broadening the chances of this strain to function as a steroid factory. The whole process still requires optimizing to achieve higher conversion yields, but this work validates the promising use of *R. ruber* for the biotechnological production of steroids such as testosterone.

## Material and methods

### Chemicals

AD was kindly given by Gadea Pharmaceutical Group. Chloroform, methanol and phenol of HPLC quality, were supplied by Scharlab S.L. Progesterone, testosterone, sodium acetate,

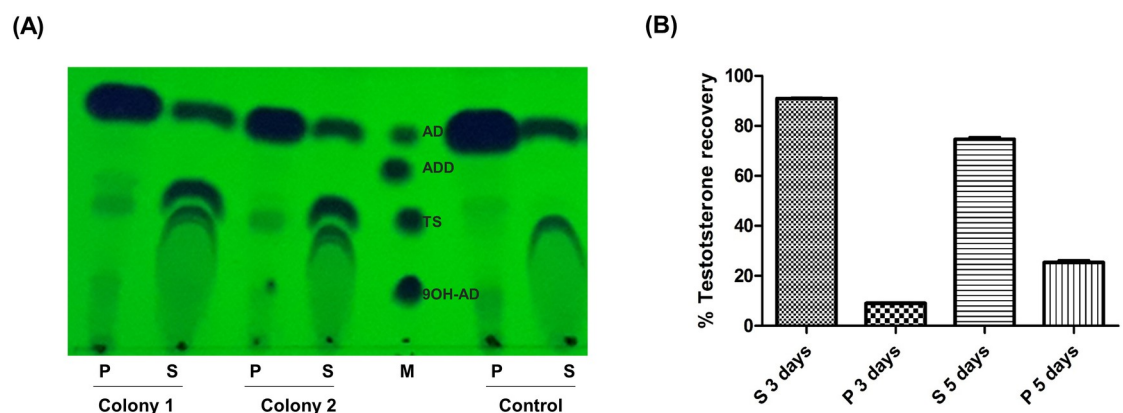

**Fig 6. Testosterone distribution in the cell culture.** The  $\Delta kshB-kstD1,2,3$  mutant harboring the pNVNIT-17 $\beta$ HSD plasmid was grown in minimal medium with sodium acetate 24 mM as carbon source at 30°C and 250 rpm. After 24 hours induction, the biotransformation assay started by adding 1 mg/mL of AD. Samples were taken at different times, centrifuged and separated in pellet (P) and supernatant (S), the steroids were extracted according to Materials and Methods. (A) TLC of two independent colonies after 3 days of biotransformation. (B) Amount of testosterone detected in P and S at 3 and 5 days of biotransformation measured by HPLC. Control: mutant strain harboring the empty pNVNIT vector. M: markers AD, ADD, TS (testosterone) and 9OH-AD (1  $\mu$ g/ $\mu$ L).

<https://doi.org/10.1371/journal.pone.0220492.g006>

acetone, tyloxapol, antibiotics,  $\epsilon$ -Caprolactam and glucose, were provided by Sigma-Aldrich. Sulphuric acid was obtained from Panreac Química S.A.U.

### Bacterial strains, culture conditions and DNA manipulation

The bacterial strains and plasmids used in this work are listed in Table 1. *Escherichia coli* cells were grown in Luria Bertani (LB) broth in an orbital shaker, at 250 rpm [45] or on LB plates containing the appropriate antibiotics at 37°C. *R. ruber* and the mutant strains were routinely grown on LB or minimal medium (Medium 457 of the DSMZ, Braunschweig, Germany) containing the desired carbon and energy source under aerobic conditions at 30°C in a rotary shaker (250 rpm) for 1–3 days. When necessary, antibiotics were added to the medium at 15  $\mu$ g/mL nalidixic acid and at 50  $\mu$ g/mL or 200  $\mu$ g/mL kanamycin for *E. coli* or *R. ruber* respectively.

For the biotransformation experiments, an LB pre-grown cultures were washed twice with minimal medium prior to inoculation to 10 mL of fresh minimal medium (initial 0.05 DO<sub>600nm</sub>) supplemented with sodium acetate at 24 mM as the only energy and carbon source.

Competent and electrocompetent cells of *E. coli* were prepared and transformed as previously described [45]. Selection of transformed cells was carried out in LB agar plates supplemented with the appropriate antibiotics.

Electroporation of 200  $\mu$ L of *R. ruber* cells was made with 1  $\mu$ g DNA at 400  $\Omega$ , 25 mA, 2.5  $\mu$ F, 10–11 milliseconds; the resulting cells were suspended in 800  $\mu$ L of LB and kept for 6 min at 46°C, and then for 5 hours at 30°C without shaking. They were finally plated on LB Agar with 200  $\mu$ g/mL kanamycin, 15  $\mu$ g/mL nalidixic acid and kept at 30°C.

The verification of the plasmid transformation of the *R. ruber* strains was made in several steps: first, plasmids were extracted from *Rhodococcus*; second, *E. coli* was transformed with the plasmid preparation and lastly, *E. coli* transformation was checked by standard methods.

All DNA manipulations were performed according to standard molecular cloning procedures [45] or following manufacturers' instructions (NZYMiniprep and NZYGelpure from NZYtech). DNA sequencing was performed with an ABI Prism 377 automated DNA sequencer (Applied Biosystems Inc.) at Secugen S.L. (Madrid, Spain).

**Table 1. Bacterial strains and plasmids used in this work.**

| Bacteria and plasmids                          | Description                                                                                                                                                                                      | Reference             |
|------------------------------------------------|--------------------------------------------------------------------------------------------------------------------------------------------------------------------------------------------------|-----------------------|
| <i>Rhodococcus ruber</i> strain Chol-4         | Wild type phenotype, Nal <sup>R</sup>                                                                                                                                                            | CECT7469 [6]          |
| <i>R. ruber</i> Chol-4 $\Delta$ kstD1,2,3      | kstD1, kstD2 and kstD3 triple deletion mutant, Nal <sup>R</sup>                                                                                                                                  | [8]                   |
| <i>R. ruber</i> Chol-4 $\Delta$ kshB-kstD1,2,3 | kshB, kstD1, kstD2 and kstD3 quadruple deletion mutant, Nal <sup>R</sup>                                                                                                                         | This work             |
| <i>E. coli</i> DH5 $\alpha$                    | F' endA1 hsdR17 (r <sub>K</sub> <sup>-</sup> m <sub>K</sub> <sup>+</sup> ) glnV44 thi-1 recA1 gyrA(Nal <sup>r</sup> ) relA1 $\Delta$ (lacIZYA-argF) U169deoR ( $\phi$ 80dlac $\Delta$ (lacZ)M15) | Laboratory collection |
| <i>E. coli</i> S17-1                           | recA pro hsdR RP4-2-Tc::Mu-Km::Tn7                                                                                                                                                               | [46]                  |
| pK18(kshBU+D)                                  | pK18mobsacB harbouring a EcoRI-PstI <i>R. ruber</i> strain Chol-4 genomic fragment containing a kshB truncated ORF                                                                               | [10]                  |
| pMK_RQ                                         | Vector harbouring the synthetic cassette NIT-1                                                                                                                                                   | Invitrogene           |
| pUC57-17 $\beta$ HSD                           | pUC57 harbouring the synthetic gene encoding the 17 $\beta$ -hsd from <i>C. lunatus</i>                                                                                                          | [5]                   |
| pNV119                                         | Km <sup>R</sup> , <i>Nocardia-E. coli</i> replicative shuttle vector                                                                                                                             | [47]                  |
| pNVNIT                                         | <i>Rhodococcus-Escherichia coli</i> , expression and shuttle vector, Km <sup>r</sup>                                                                                                             | This work             |
| pNVNIT-17HSD                                   | <i>Rhodococcus-Escherichia coli</i> , expression and shuttle vector harbouring the 17 $\beta$ -hsd gene, Km <sup>r</sup>                                                                         | This work             |

<https://doi.org/10.1371/journal.pone.0220492.t001>

### Construction of the *R. ruber* $\Delta kshB$ -*kstD1,2,3* mutant strain

The *kshB* gene was chromosomally deleted for this work using the *R. ruber* triple mutant  $\Delta kstD1,2,3$  as host and following the unmarked gene deletion method previously described [8] using the plasmid pK18(*kshBU*+D) [9] and the *E. coli* strain S17-1 (Table 1).

The construction of the deleted strain was verified by PCR using the primers CH564 (5' - CGCGTCTCTCCTGATGTGTCGG) and CH331 (5' - ACGTAGCCTGCCTCGATGTCC) , at Tm 55°C, 1.5 min and 30 cycles, and further DNA sequencing. In all cases, the Expand High-Fidelity Taq DNA Polymerase from Roche was used for PCR reactions in a Mastercycler personal (Eppendorf). Restriction enzymes and DNA modifying enzymes were purchased to Takara Bio Inc. and New England Biolabs (UK).

### Construction of an expression plasmid for *R. ruber* and $17\beta$ -*hsd* gene cloning

The *Nocardial* high-copy-number cloning vector pNV119 [48] was modified to be used as a *R. ruber* expression vector. The NIT-1 cassette (GenBank: FJ173069), an artificial bacterial regulon developed for mycobacteria [36], was synthesized (Invitrogen) and cloned into the *KpnI*-*SphI* restriction sites of the pNV119 plasmid. This regulon can use an inexpensive and non-toxic nitrile analog,  $\epsilon$ -caprolactam, as an inducer [36]. The resulting plasmid pNVNIT was checked by restriction analysis and sequenced.

On the other hand, the  $17\beta$ -*hsd* gene of *C. lunatus* with an optimized codon usage for *Mycobacterium* expression was obtained from digestion of the plasmid pUC57-17HSD [5] with *NdeI*-*HincII* restriction enzymes and cloned into the pNVNIT expression plasmid previously digested with *NdeI*-*DraI* yielding pNVNIT-17 $\beta$ HSD. This plasmid and a control vector without the  $17\beta$ -*hsd* gene were used to electroporate both *R. ruber* wild-type and the  $\Delta kshB$ -*kstD1,2,3* mutant.

The primers employed to confirm the cloning of the pNIT-1 cassette and  $17\beta$ -*hsd* gene were F24 (5' -CGCCAGGGTTTTCCAGTCACGAC) and R24 (5' -AGCGGATAACAAT TTCACACAGGA) , at Tm 58°C, 1 min, 30 cycles.

### Monitoring of AD biotransformation into testosterone by analytical methods

The  $\Delta kshB$ -*kstD1,2,3* strain and *R. ruber* wild type were electroporated with either the empty plasmid pNVNIT as control or the plasmid harboring the  $17\beta$ -*hsd* gen of *C. lunatus* (pNVNIT-17 $\beta$ HSD). The recombinant strains were grown in 10 mL of LB medium or minimal medium (MM) with sodium acetate (24 mM) as carbon and energy source with 200  $\mu$ g/mL kanamycin and 15  $\mu$ g/mL nalidixic acid, at 30°C in a rotary shaker (250 rpm). Cells were grown up to 0.8 OD<sub>600nm</sub>, then induced with 28 mM  $\epsilon$ - caprolactam for 24h; at this point the cultures were in stationary phase with an OD<sub>600nm</sub> 2.5  $\pm$  0.3 (MM) or OD<sub>600nm</sub> 9.0  $\pm$  1.0 (LB). Afterwards, 1 mg/mL AD (LB cultures) or 1 mM AD with or without 1% (w/v) glucose (MM cultures) was added. Due to the low solubility of this steroid, the 1 mM AD was prepared from a 10 mM stock dissolved by sonication in 10% (w/v) tyloxapol. The stock solution was autoclaved and kept at room temperature prior to its addition to the minimal medium. Aliquots of 500  $\mu$ L of the cell culture were taken at fixed times up to 120 hours.

For the analytical studies, the lipid fraction of the samples was obtained by double extraction with 1 mL chloroform and left to dry at 65°C. Two analytical methods were used: the first approach by TLC and a second one by HPLC.

The AD in the TLC experiment was added as powder because the presence of cyclodextrins or tyloxapol damages the TLC plate.

50  $\mu$ L of chloroform were added to every dried sample and an aliquot of 5  $\mu$ L was applied onto aluminium TLC Silica gel 60 F254 sheets (Merck). Chromatography was performed using chloroform:acetone (9:1 v/v) as solvent and spots were revealed by UV exposure ( $\lambda_{254\text{nm}}$ ). Afterwards, the TLC plate was dunked into a sulphuric acid:methanol solution (1:9 v/v) followed by a drying step with warm air and heating 1 min at 100°C. 1  $\mu$ g of standard control samples (testosterone, AD, ADD, and 9OH-AD) were also included in the analysis.

For the reverse-phase HPLC analysis, samples were resuspended in 600  $\mu$ L chloroform and filtered. Steroids were separated on a Teknokroma mediterranea<sup>TM</sup> Sea<sub>18</sub> column (15 cm x 0.46 cm; 5  $\mu$ M) and UV detected at 245 nm at room temperature. The mobile phase was composed of methanol and water (70/30 v/v) at a flow rate of 1 mL/min. Progesterone was used as an extraction control and phenol as an internal standard on HPLC. AD, ADD, progesterone, and testosterone were used as steroid standards. The conversion rate of TS was calculated on the basis of AD measured into the sample in the resting-cell biotransformations.

## Supporting information

**S1 Fig. The steroid chemical structure.** A) Steroids are a group of natural compounds derived from the hydrophobic and planar gonane nucleus. This carbon backbone core is composed of four rings: three six-member cyclohexane rings (A, B and C) and one five-member cyclopentane ring (D). Steroids vary from one another in the nature of the functional groups attached to the D ring and in the oxidation state. B) One example of steroid is Cholesterol that contains a polar hydroxyl group and a short hydrocarbon tail. The substituents in  $\alpha$  configuration are represented by broken lines; substituents in  $\beta$  configuration, with solid lines. Carbon atoms are numbered.

(TIF)

**S2 Fig. Steroids growth experiments of *R. ruber* wild-type and  $\Delta$ kshB-kstD1,2,3 mutant strains.** Cultures in minimal media at 30°C and 250 rpm, containing 24 mM sodium acetate, 2 mM AD, 2 mM ADD, 1.8 mM cholesterol or 2 mM testosterone as the only carbon source after 48 hours of growth.

(TIF)

**S1 Table. List of *R. ruber* steroid mutants available.**

(DOCX)

**S2 Table. Microbial conversion of natural sterols to testosterone.**

(DOCX)

## Acknowledgments

We would like to thank José Luis García and his group from CIB-CSIC for their technical support and brilliant ideas. We are also very grateful to Jose Luis Barredo (Gadea) for coordinating the RTC project and providing us with resources.

## Author Contributions

**Conceptualization:** Govinda Guevara, Julián Perera, Juana María Navarro Llorens.

**Data curation:** Govinda Guevara.

**Formal analysis:** Govinda Guevara, Juana María Navarro Llorens.

**Funding acquisition:** Julián Perera.

**Investigation:** Govinda Guevara, Yamileth Olortegui Flores, Laura Fernández de las Heras.

**Methodology:** Govinda Guevara, Laura Fernández de las Heras.

**Project administration:** Julián Perera, Juana María Navarro Llorens.

**Resources:** Govinda Guevara, Julián Perera.

**Supervision:** Govinda Guevara, Julián Perera, Juana María Navarro Llorens.

**Validation:** Govinda Guevara, Julián Perera, Juana María Navarro Llorens.

**Visualization:** Govinda Guevara, Juana María Navarro Llorens.

**Writing – original draft:** Govinda Guevara, Julián Perera, Juana María Navarro Llorens.

**Writing – review & editing:** Govinda Guevara, Julián Perera, Juana María Navarro Llorens.

## References

1. Fernández-Cabezón L, Galán B, García JL. New Insights on Steroid Biotechnology. *Front Microbiol.* 2018 May 15; 9: 958. <https://doi.org/10.3389/fmicb.2018.00958> PMID: 29867863
2. Jasem JA, Khan M, Taha A, Thiemann T. Preparation of steroidal hormones with an emphasis on transformations of phytosterols and cholesterol—a review. *Mediterranean Journal of Chemistry.* 2014; 3(2): 796–830.
3. Bergstrand LH, Cardenas E, Holert J, Van Hamme JD, Mohn WW. Delineation of Steroid-Degrading Microorganisms through Comparative Genomic Analysis. *MBio.* 2016 Mar 8; 7(2) e00166-16. <https://doi.org/10.1128/mBio.00166-16> PMID: 26956583
4. Dlugovitzky DG, Fontela MS, Martinel Lamas DJ, Valdez RA, Romano MC. *Mycobacterium smegmatis* synthesizes in vitro androgens and estrogens from different steroid precursors. *Can J Microbiol.* 2015; 61(7): 451–455. <https://doi.org/10.1139/cjm-2015-0025> PMID: 25994226
5. Fernández-Cabezón L, Galán B, García JL. Engineering *Mycobacterium smegmatis* for testosterone production. *Microb Biotechnol.* 2017; 10(1): 151–161. <https://doi.org/10.1111/1751-7915.12433> PMID: 27860310
6. Fernández de las Heras L, García Fernández E, María Navarro Llorens J, Perera J, Drzyzga O. Morphological, physiological, and molecular characterization of a newly isolated steroid-degrading actinomyce, identified as *Rhodococcus ruber* strain Chol-4. *Curr Microbiol.* 2009; 59(5): 548–553. <https://doi.org/10.1007/s00284-009-9474-z> PMID: 19688376
7. Fernández de las Heras L, Perera J, Navarro Llorens JM. Cholesterol to cholestenone oxidation by ChoG, the main extracellular cholesterol oxidase of *Rhodococcus ruber* strain Chol-4. *J Steroid Biochem Mol Biol.* 2014; 139: 33–44. <https://doi.org/10.1016/j.jsbmb.2013.10.001> PMID: 24125733
8. Fernández de las Heras L, van der Geize R, Drzyzga O, Perera J, María Navarro Llorens J. Molecular characterization of three 3-ketosteroid-Delta(1)-dehydrogenase isoenzymes of *Rhodococcus ruber* strain Chol-4. *J Steroid Biochem Mol Biol.* 2012; 132(3–5): 271–281. <https://doi.org/10.1016/j.jsbmb.2012.06.005> PMID: 22771584
9. Guevara G, Fernández de las Heras L, Perera J, Navarro Llorens JM. Functional characterization of 3-ketosteroid 9alpha-hydroxylases in *Rhodococcus ruber* strain chol-4. *J Steroid Biochem Mol Biol.* 2017; 172: 176–187. <https://doi.org/10.1016/j.jsbmb.2017.06.011> PMID: 28642093
10. Guevara G, Fernández de Las Heras L, Perera J, Navarro-Llorens JM. Functional differentiation of 3-ketosteroid Delta(1)-dehydrogenase isozymes in *Rhodococcus ruber* strain Chol-4. *Microb Cell Fact.* 2017 Mar 14; 16(1): 42. <https://doi.org/10.1186/s12934-017-0657-1> PMID: 28288625
11. Angelova B, Fernandes P, Cruz A, Pinheiro HM, Mutafov S, Cabral JMS. Hydroxylation of androstenedione by resting *Rhodococcus* sp. cells in organic media. *Enzyme and Microbial Technology.* 2005; 37(7): 718–722.
12. Mutafov S, Angelova B, Avramova T, Boyadjieva L, Dimova I. The inducibility of 9 $\alpha$ -steroid hydroxylating activity in resting *Rhodococcus* sp. cells. *Process Biochemistry.* 1997; 32(7):585–589.
13. Venkataraman H, Te Poele EM, Rosloniec KZ, Vermeulen N, Commandeur JN, van der Geize R, et al. Biosynthesis of a steroid metabolite by an engineered *Rhodococcus erythropolis* strain expressing a mutant cytochrome P450 BM3 enzyme. *Appl Microbiol Biotechnol.* 2015; 99(11): 4713–4721. <https://doi.org/10.1007/s00253-014-6281-7> PMID: 25511824
14. Yam KC, Okamoto S. Adventures in *Rhodococcus*—from steroids to explosives. *Can J Microbiol* 2011; 57(3): 155–168. <https://doi.org/10.1139/W10-115> PMID: 21358756

15. García JL, Uhía I, Galán B. Catabolism and biotechnological applications of cholesterol degrading bacteria. *Microb Biotechnol*. 2012; 5(6): 679–699. <https://doi.org/10.1111/j.1751-7915.2012.00331.x> PMID: 22309478
16. Horinouchi M, Hayashi T, Kudo T. Steroid degradation in *Comamonas testosteroni*. *J Steroid Biochem Mol Biol*. 2012; 129(1–2): 4–14. <https://doi.org/10.1016/j.jsbmb.2010.10.008> PMID: 21056662
17. Philipp B. Bacterial degradation of bile salts. *Appl Microbiol Biotechnol*. 2011; 89(4): 903–915. <https://doi.org/10.1007/s00253-010-2998-0> PMID: 21088832
18. Uhía I, Galán B, Kendall SL, Stoker NG, García JL. Cholesterol metabolism in *Mycobacterium smegmatis*. *Environ Microbiol Rep*. 2012; 4(2): 168–182. <https://doi.org/10.1111/j.1758-2229.2011.00314.x> PMID: 23757270
19. Petrusma M, van der Geize R, Dijkhuizen L. 3-Ketosteroid 9 $\alpha$ -hydroxylase enzymes: Rieske non-heme monooxygenases essential for bacterial steroid degradation. *Antonie Van Leeuwenhoek*. 2014; 106(1): 157–172. <https://doi.org/10.1007/s10482-014-0188-2> PMID: 24846050
20. Florin C, Kohler T, Grandguillot M, Plesiat P. *Comamonas testosteroni* 3-ketosteroid- $\delta$  4(5  $\alpha$ )-dehydrogenase: gene and protein characterization. *J Bacteriol*. 1996; 178(11): 3322–3330. <https://doi.org/10.1128/jb.178.11.3322-3330.1996> PMID: 8655514
21. Itagaki E, Hatta T, Wakabayashi T, Suzuki K. Spectral properties of 3-ketosteroid- $\delta$  1-dehydrogenase from *Nocardia corallina*. *Biochim Biophys Acta*. 1990; 1040(2): 281–286. [https://doi.org/10.1016/0167-4838\(90\)90088-w](https://doi.org/10.1016/0167-4838(90)90088-w) PMID: 2400777
22. Itagaki E, Wakabayashi T, Hatta T. Purification and characterization of 3-ketosteroid- $\delta$  1-dehydrogenase from *Nocardia corallina*. *Biochim Biophys Acta*. 1990; 1038(1): 60–67. [https://doi.org/10.1016/0167-4838\(90\)90010-d](https://doi.org/10.1016/0167-4838(90)90010-d) PMID: 2317517
23. Capyk JK, D'Angelo I, Strynadka NC, Eltis LD. Characterization of 3-ketosteroid 9 $\alpha$ -hydroxylase, a rieske oxygenase in the cholesterol degradation pathway of *Mycobacterium tuberculosis*. *J Biol Chem*. 2009; 284(15): 9937–9946. <https://doi.org/10.1074/jbc.M900719200> PMID: 19234303
24. Donova MV, Egorova OV, Nikolayeva VM. Steroid 17 $\beta$ -reduction by microorganisms—a review. *Process Biochemistry*. 2005; 40: 2253–2262.
25. Kristan K, Stojan J, Adamski J, Lanisnik Rizner T. Rational design of novel mutants of fungal 17 $\beta$ -hydroxysteroid dehydrogenase. *J Biotechnol*. 2007; 129(1): 123–130. <https://doi.org/10.1016/j.jbiotec.2006.11.025> PMID: 17196285
26. Kristan K, Stojan J, Moller G, Adamski J, Rizner TL. Coenzyme specificity in fungal 17 $\beta$ -hydroxysteroid dehydrogenase. *Mol Cell Endocrinol*. 2005; 241(1–2): 80–87. <https://doi.org/10.1016/j.mce.2005.05.007> PMID: 15998565
27. Rižner TL, Adamski J, Stojan J. 17 $\beta$ -hydroxysteroid dehydrogenase from *Cochliobolus lunatus*: model structure and substrate specificity. *Arch Biochem Biophys*. 2000; 384(2): 255–262. <https://doi.org/10.1006/abbi.2000.2064> PMID: 11368312
28. Rižner TL, Moeller G, Thole HH, Žakelj-Mavrič M, Adamski J. A novel 17 $\beta$ -hydroxysteroid dehydrogenase in the fungus *Cochliobolus lunatus*: new insights into the evolution of steroid-hormone signaling. *Biochem J*. 1999; 337 (Pt 3): 425–431.
29. Rižner TL, Stojan J, Adamski J. Searching for the physiological function of 17 $\beta$ -hydroxysteroid dehydrogenase from the fungus *Cochliobolus lunatus*: studies of substrate specificity and expression analysis. *Mol Cell Endocrinol*. 2001; 171(1–2): 193–198. PMID: 11165029
30. Rižner TL, Stojan J, Adamski J. 17 $\beta$ -hydroxysteroid dehydrogenase from the fungus *Cochliobolus lunatus*: structural and functional aspects. *Chem Biol Interact*. 2001; 130-132(1–3): 793–803. PMID: 11306095
31. Rižner TL, Žakelj-Mavrič M. Characterization of fungal 17 $\beta$ -hydroxysteroid dehydrogenases. *Comparative Biochemistry and Physiology Part B: Biochemistry and Molecular Biology*. 2000; 127(1): 53–63. PMID: 11126752
32. Cassetta A, Stojan J, Krastanova I, Kristan K, Brunskole Sveglj M, Lamba D, et al. Structural basis for inhibition of 17 $\beta$ -hydroxysteroid dehydrogenases by phytoestrogens: The case of fungal 17 $\beta$ -HSDc1. *J Steroid Biochem Mol Biol*. 2017; 171: 80–93. <https://doi.org/10.1016/j.jsbmb.2017.02.020> PMID: 28259640
33. Bogovich K, Payne AH. Purification of rat testicular microsomal 17-ketosteroid reductase. Evidence that 17-ketosteroid reductase and 17  $\beta$ -hydroxysteroid dehydrogenase are distinct enzymes. *J Biol Chem*. 1980; 255(12): 5552–5559. PMID: 6247338
34. Peltoketo H, Luu-The V, Simard J, Adamski J. 17 $\beta$ -hydroxysteroid dehydrogenase (HSD)/17-ketosteroid reductase (KSR) family; nomenclature and main characteristics of the 17HSD/KSR enzymes. *J Mol Endocrinol*. 1999; 23(1): 1–11. PMID: 10431140

35. Moeller G, Adamski J. Multifunctionality of human 17beta-hydroxysteroid dehydrogenases. *Mol Cell Endocrinol.* 2006; 248(1–2): 47–55. <https://doi.org/10.1016/j.mce.2005.11.031> PMID: 16413960
36. Pandey AK, Raman S, Proff R, Joshi S, Kang CM, Rubin EJ, et al. Nitrile-inducible gene expression in mycobacteria. *Tuberculosis (Edinb).* 2009; 89(1): 12–16.
37. Agarwal AK, Auchus RJ. Minireview: cellular redox state regulates hydroxysteroid dehydrogenase activity and intracellular hormone potency. *Endocrinology.* 2005; 146(6): 2531–2538. <https://doi.org/10.1210/en.2005-0061> PMID: 15774561
38. Sherbet DP, Papari-Zareei M, Khan N, Sharma KK, Brandmaier A, Rambally S, et al. Cofactors, redox state, and directional preferences of hydroxysteroid dehydrogenases. *Mol Cell Endocrinol.* 2007; 265–266: 83–88. <https://doi.org/10.1016/j.mce.2006.12.021> PMID: 17222963
39. Zhao H, van der Donk WA. Regeneration of cofactors for use in biocatalysis. *Curr Opin Biotechnol.* 2003; 14(6): 583–589. PMID: 14662386
40. Taniguchi H, Okano K, Honda K. Modules for in vitro metabolic engineering: Pathway assembly for bio-based production of value-added chemicals. *Synth Syst Biotechnol.* 2017; 2(2): 65–74. <https://doi.org/10.1016/j.synbio.2017.06.002> PMID: 29062963
41. Egorova OV, Nikolayeva VM, Sukhodolskaya GV, Donova M. Transformation of C 19-steroids and testosterone production by sterol-transforming strains of *Mycobacterium* spp. *Journal of Molecular Catalysis B Enzymatic.* 2009; 57(1): 198–203.
42. Liu WH, Lo CK. Production of testosterone from cholesterol using a single-step microbial transformation of *Mycobacterium* sp. *J Ind Microbiol Biotechnol.* 1997; 19(4): 269–272. PMID: 9439002
43. Liu Y, Wang Y, Chen X, Wu Q, Wang M, Zhu D, et al. Regio- and stereoselective reduction of 17-oxosteroids to 17beta-hydroxysteroids by a yeast strain *Zygowillioopsis* sp. WY7905. *Steroids.* 2017; 118: 17–24. <https://doi.org/10.1016/j.steroids.2016.11.002> PMID: 27864020
44. Singer Y, Shity H, Bar R. Microbial transformations in a cyclodextrin medium. Part 2. Reduction of androstenedione to testosterone by *Saccharomyces cerevisiae*. *Applied Microbiology and Biotechnology.* 1991; 35(6): 731–737.
45. Sambrook J, Fritsch EF, Maniatis T. *Molecular cloning: A Laboratory Manual.* N.Y.: Cold Spring Harbor Laboratory Press; 1989.
46. Simon R, Priefer U, Pühler A. A broad host range mobilization system for in vivo genetic engineering: transposon mutagenesis in gram negative bacteria. *Biotechnology.* 1983; 1:748–791.
47. Chiba K, Hoshino Y, Ishino K, Kogure T, Mikami Y, Uehara Y, et al. Construction of a pair of practical *Nocardia-Escherichia coli* shuttle vectors. *Jpn J Infect Dis.* 2007; 60(1): 45–47. PMID: 17314425
48. Bourn WR, Jansen Y, Stutz H, Warren RM, Williamson AL, van Helden PD. Creation and characterisation of a high-copy-number version of the pAL5000 mycobacterial replicon. *Tuberculosis (Edinb).* 2007; 87(6): 481–488.
